# Supplementary material for: Mixed Infection of Blackcurrant with a Novel Cytorhabdovirus and Black Currant-Associated Nucleorhabdovirus
Source: MDPI journal article supplement (doi:10.3390/v14112456), 2022-11-06
Supplement: s1 [file s1]

Supplementary Material

**Supplementary Table S1.** Primers used in this work.

| <b>primer</b> | <b>5' - 3'</b>             | <b>use</b>      |
|---------------|----------------------------|-----------------|
| 3191          | CCTCTGCAACCTTTCTTGGA       | 3' RACE         |
| 3192          | GCCCAAACCTTCTGAGGTTCT      | 3' RACE         |
| 3193          | ACCATTGCCTCTCCTAAAGC       | 3' RACE         |
| 3197          | CCCACATCTTACAAGCCGAT       | 5' RACE         |
| 3198          | CGGCATCTTTGAAAGCAGAC       | 5' RACE         |
| 3199          | CCAGTGCGATCTCCTGATT        | 5' RACE         |
| 3136          | CCATGTTCAGGACATTCAAACC     | RT-qPCR BCaRV   |
| 3137          | ACATTGAAGATTTTGGACTAGGTTTA | RT-qPCR BCaRV   |
| 3395          | CACAGGGGAAGTGTCATACC       | RT-qPCR BCCRhV1 |
| 3396          | TACAGTTAGCTCCCGATCGA       | RT-qPCR BCCRhV1 |
| AtropaNad2.1a | GGACTCCTGACGTATACGAAGGATC  | RT-qPCR NADH    |
| AtropaNad2.2b | AGCAATGAGATTCCCCAATATCAT   | RT-qPCR NADH    |
| LV            | GAGIACYTGRTRTCICC          | Rhabdo-specific |
| DF            | GAYTTYGARAARTGGAACGG       | Rhabdo-specific |
